# Supplementary material for: Digoxin promotes anoikis of circulating cancer cells by targeting Na+/K+-ATPase α3-isoform
Source: Springer Nature journal article supplement (doi:10.1038/s41419-025-07703-z), 2025-05-11
Supplement: MOESM1 [file 41419_2025_7703_MOESM1_ESM.pdf]

**A****Human CD45 antibody**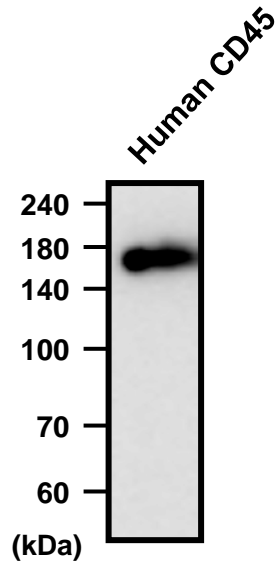**B****Mouse CD45 antibody**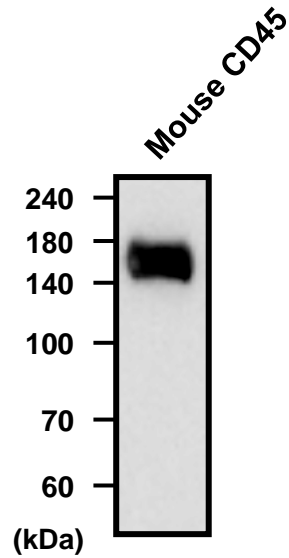

**Fig. S1: Confirmation of the reactivity of human and mouse CD45 antibodies.**

Western blotting was performed using anti-human CD45 (A) and anti-mouse CD45 (B) antibodies on human (~170 kDa) and mouse CD45 (~160 kDa) proteins derived from the mouse myeloma cell line (NS0). Typical images were shown.

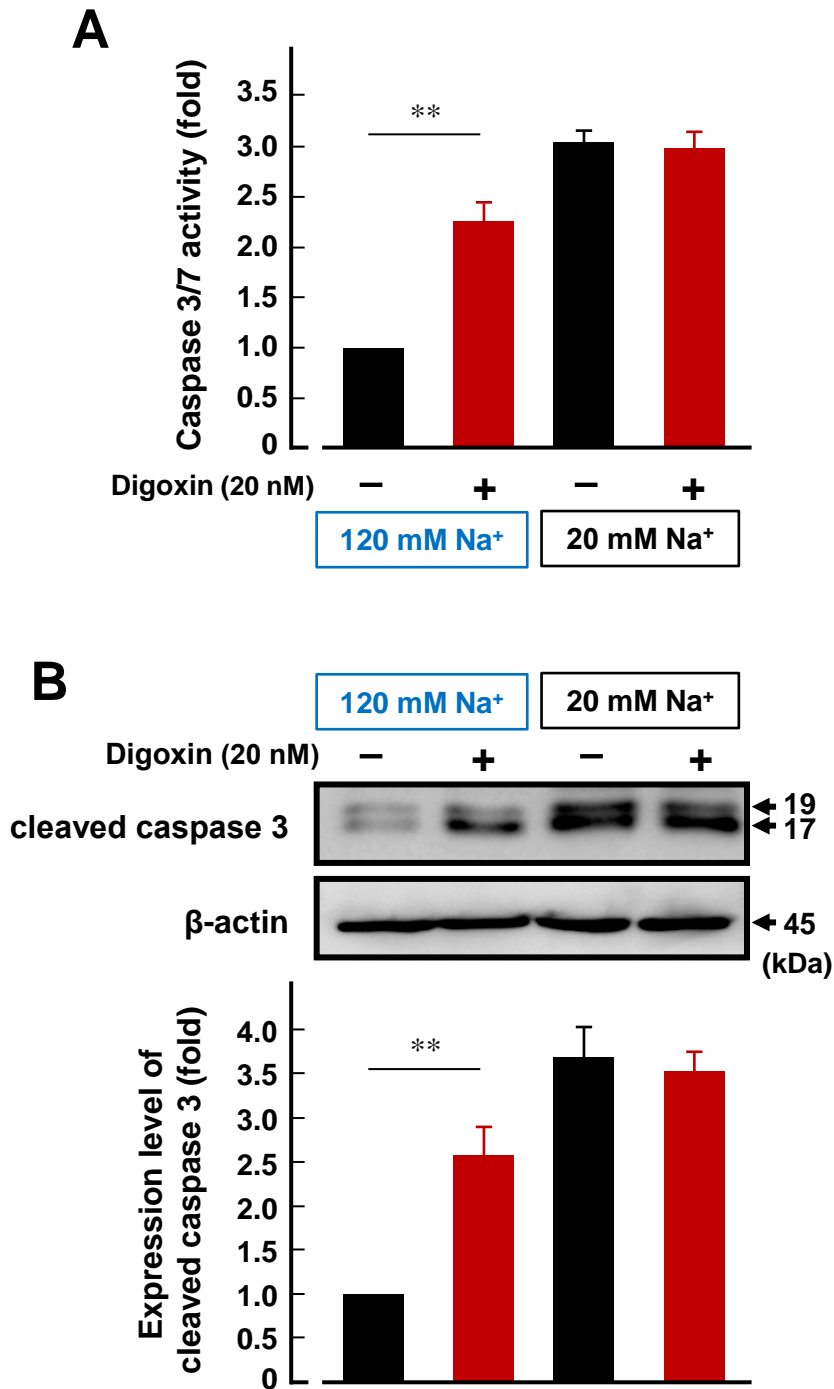

**Fig. S2: Effects of digoxin on apoptosis in detached MKN45 cells.**

**A** Effect of digoxin (20 nM) on caspase 3/7 activity of detached MKN45 cells cultured in medium containing 120 mM Na<sup>+</sup> or 20 mM Na<sup>+</sup>. The activity in the digoxin-treated cells was compared with untreated cells (control).  $n = 6$ . \*\*,  $p < 0.01$ . **B** Effects of digoxin (20 nM) on the expression level of cleaved caspase 3 in detached MKN45 cells cultured in medium containing 120 mM Na<sup>+</sup> or 20 mM Na<sup>+</sup>. Typical images of Western blots using antibodies against cleaved caspase 3 (17 and 19 kDa) and  $\beta$ -actin (45 kDa) in the cell lysates were shown. In the lower panel, the expression levels of cleaved caspase-3 were quantified and normalized to those of  $\beta$ -actin.  $n = 5$ . \*\*,  $p < 0.01$ .
